# Supplementary material for: Positive cofactor 4 (PC4) contributes to the regulation of replication-dependent canonical histone gene expression
Source: PubMed Central journal article supplement (PMC6062981; doi:10.1186/s12867-018-0110-y), 2018-07-27
Supplement: 12867_2018_110_MOESM1_ESM.pdf [file 12867_2018_110_MOESM1_ESM.pdf]

**Additional file 1: Table S1.** List of PC4 protein identifications by mass spectrometry.

| PMSS* | Seq. cov. (%) | Sample analyzed                |
|-------|---------------|--------------------------------|
| 65.8  | 26            | 1xMS2-purified                 |
| 48.6  | 26            | 3xMS2-purified                 |
| 13.0  | 19            | 3xMS2-purified                 |
| 16.4  | 19            | negative control sample        |
| 72.2  | 32            | gradient, then biotin-purified |
| 39.4  | 26            | gradient, then biotin-purified |
| 22.7  | 19            | gradient, then biotin-purified |
| 37.4  | 31            | gradient, then biotin-purified |

\*PMSS score is a measure for semiquantitative protein abundance; 1xMS2(3xMS2)-purified sample: fraction eluted after affinity purification of 1xMS2(3x-MS2)-labeled U7 snRNA; biotin-purified: fraction eluted after pull down using antisense biotinylated oligonucleotide; gradient: protein extract was fractionated on 10-50% glycerol gradient and selected fractions were affinity-purified as indicated.
