# Supplementary material for: Positive cofactor 4 (PC4) contributes to the regulation of replication-dependent canonical histone gene expression
Source: PubMed Central journal article supplement (PMC6062981; doi:10.1186/s12867-018-0110-y), 2018-07-27
Supplement: 12867_2018_110_MOESM3_ESM.pdf [file 12867_2018_110_MOESM3_ESM.pdf]

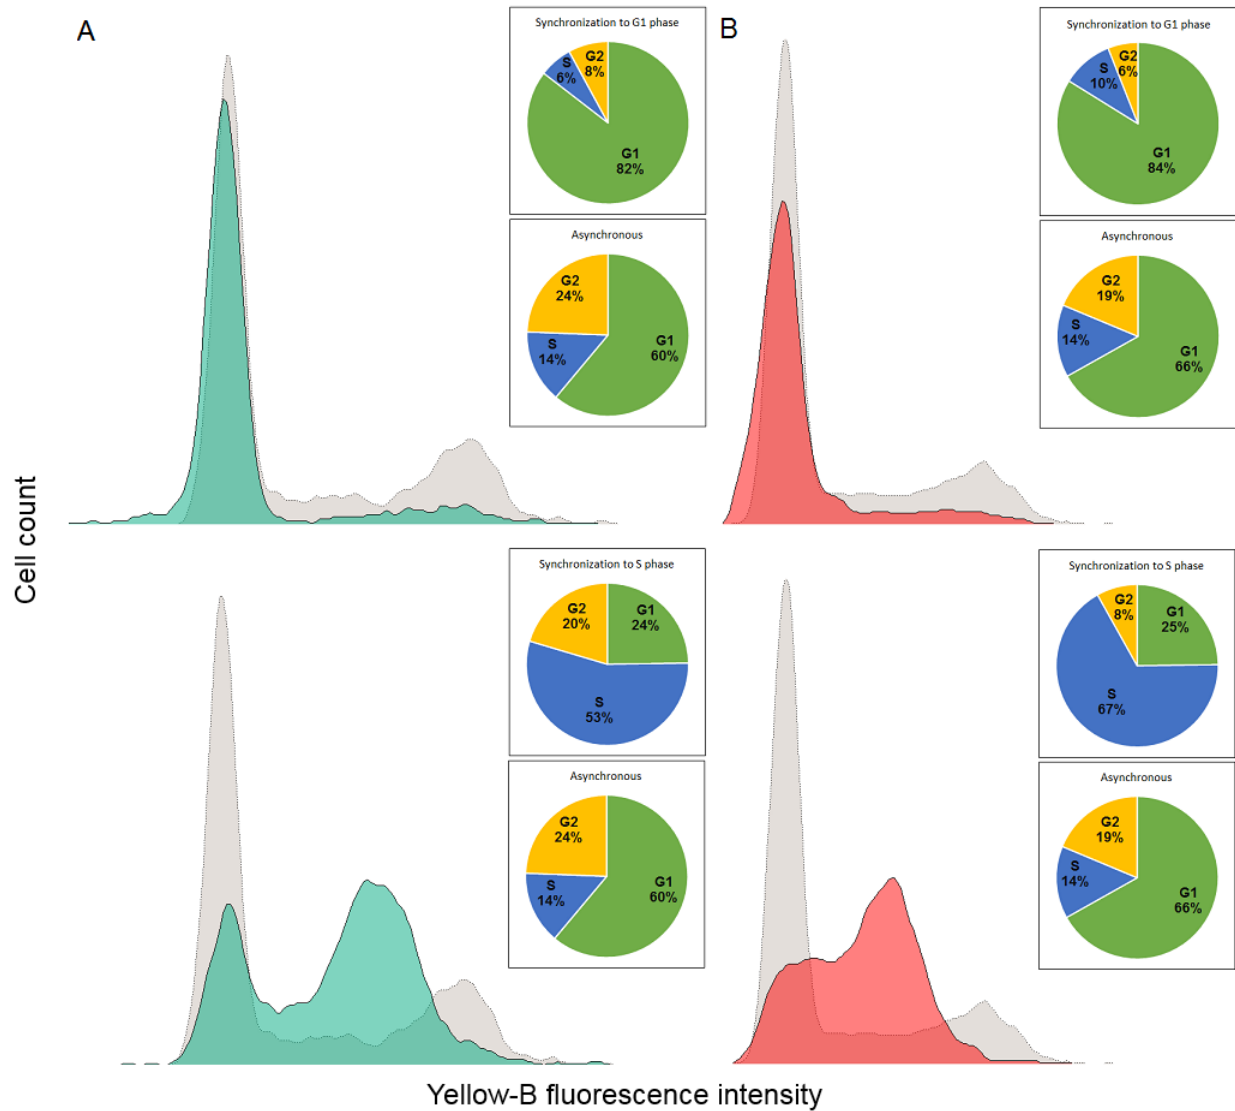

**Additional file 3: Figure S2.** Flow cytometry analysis of propidium iodide-stained HeLa cells with PC4 overexpression (A) and PC4 knockdown (B) after synchronization. Graphs represent number of cells synchronized to G1 (upper panel) or to S phase (lower panel) to Yellow-B fluorescence intensity. Grey color on the histogram symbolizes asynchronous cells.
