# Supplementary material for: Positive cofactor 4 (PC4) contributes to the regulation of replication-dependent canonical histone gene expression
Source: PubMed Central journal article supplement (PMC6062981; doi:10.1186/s12867-018-0110-y), 2018-07-27
Supplement: 12867_2018_110_MOESM4_ESM.pdf [file 12867_2018_110_MOESM4_ESM.pdf]

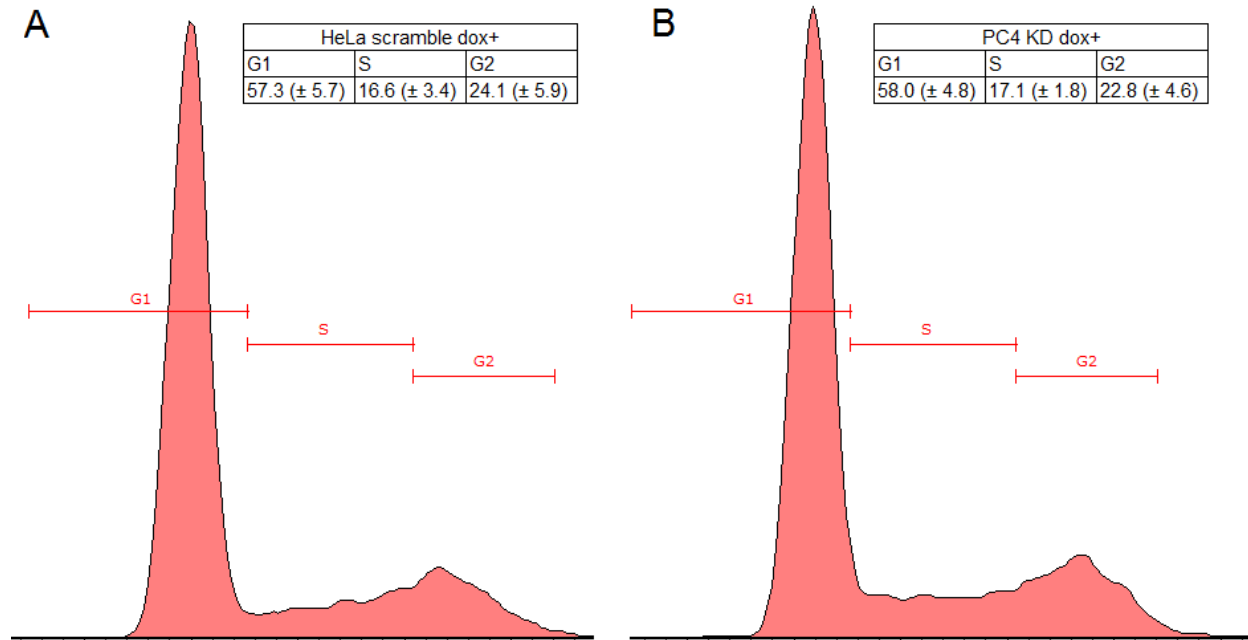

**Additional file 4: Figure S3.** Flow cytometry analysis of propidium iodide-stained asynchronous HeLa scramble cells (A) and PC4 knockdown (B). Numbers represent mean value of cells percentage with provided standard deviation value ( $\pm$  SD).
