# Supplementary material for: Positive cofactor 4 (PC4) contributes to the regulation of replication-dependent canonical histone gene expression
Source: PubMed Central journal article supplement (PMC6062981; doi:10.1186/s12867-018-0110-y), 2018-07-27
Supplement: 12867_2018_110_MOESM5_ESM.pdf [file 12867_2018_110_MOESM5_ESM.pdf]

**Additional file 5: Table S2.** Oligonucleotides cloned into pLKO-Tet-On plasmid used for inducible gene knockdown in HeLa cells.

| Target mRNA | Description             | Sequence 5'-3'                                                     |
|-------------|-------------------------|--------------------------------------------------------------------|
| scramble    | <i>sense strand</i>     | CCGGT <b>CCTAAGGTTAAGTCGCCCTCG</b> CTCGAGCGAGGGCGACTTAACCTTAGGTTTT |
|             | <i>antisense strand</i> | CCTAAGGTTAAGTCGCCCTCGCTCGAGCGAGGGCGACTTAACCTTAGG                   |
| PC4         | <i>sense strand</i>     | CCGG <b>GCAGCAGAGATGATAACAT</b> CTCGAGATGTTATCATCTCTGCTGCTTTTT     |
|             | <i>antisense strand</i> | AATTA <b>AAAAGCAGCAGAGATGATAACAT</b> CTCGAGATGTTATCATCTCTGCTGC     |

The sequences of siRNA are marked.
